1 **The ecology of the Chloroflexi in full-scale activated sludge**  
2 **wastewater treatment plants**

3 **Marta Nierychlo<sup>1</sup>, Aleksandra Milobędzka<sup>2,3</sup>, Francesca Petriglieri<sup>1</sup>, Bianca**  
4 **McIlroy<sup>1</sup>, Per Halkjær Nielsen<sup>1</sup>, and Simon Jon McIlroy<sup>1§\*</sup>**

5 <sup>1</sup>Center for Microbial Communities, Department of Chemistry and Bioscience,  
6 Aalborg University, Aalborg, Denmark

7 <sup>2</sup>Microbial Ecology and Environmental Biotechnology Department, Institute of  
8 Botany, Faculty of Biology, University of Warsaw; Biological and Chemical  
9 Research Centre, Żwirki i Wigury 101, Warsaw 02-089, Poland

10 <sup>3</sup>Department of Biology, Faculty of Building Services, Hydro and Environmental  
11 Engineering, Warsaw University of Technology, 00-653 Warsaw, Poland

12 \* Corresponding author: Simon Jon McIlroy, Center for Microbial Communities,  
13 Department of Chemistry and Bioscience, Aalborg University, Fredrik Bajers Vej 7H,  
14 DK-9220 Aalborg, Denmark; Tel.: +45 9940 3573; Fax: +45 9814 1808; Email:  
15 s.mcilroy@uq.edu.au

16 § Present address: Australian Centre for Ecogenomics, University of Queensland,  
17 Australia

18 **Abstract**

19 Filamentous bacteria belonging to the phylum Chloroflexi have received considerable  
20 attention in wastewater treatment systems for their suggested role in operational  
21 problem of impaired sludge settleability known as bulking. Their consistently high  
22 abundance in full-scale systems, even in the absence of bulking, indicates that they  
23 make a substantial contribution to the nutrient transformations during wastewater  
24 treatment. In this study, extensive 16S rRNA amplicon surveys of full-scale Danish  
25 WWTPs were screened to identify the most numerically important Chloroflexi  
26 genera. Fluorescence *in situ* hybridization probes were designed for their *in situ*  
27 characterization. All abundant phylotypes of the phylum were identified as facultative  
28 anaerobic chemoorganotrophs involved in fermentation of sugars. These groups were  
29 all filamentous but differed in their morphology and spatial arrangement. ‘*Candidatus*  
30 *Villigracilis*’ was predominantly located within the activated sludge flocs, where they  
31 possibly have structural importance, and their abundance was relatively stable.  
32 Conversely, the abundance of ‘*Candidatus Amarolinea*’ was highly dynamic, relative  
33 to other genera, sometimes reaching abundances in excess of 30% of the biovolume,  
34 suggesting their likely role in bulking episodes. This study gives an important insight  
35 into the role of Chloroflexi in WWTPs, thus contributing to the broader goal of  
36 understanding the ecology of these biotechnologically important systems.

37 **Keywords**

38 Activated sludge; Filamentous bulking; Chloroflexi; ‘*Candidatus Amarolinea*’, FISH;  
39 Microautoradiography

## 40 **Introduction**

41 Members of the phylum Chloroflexi constitute a substantial proportion of the  
42 activated sludge community in full-scale activated sludge wastewater treatment plants  
43 (WWTPs), where they reportedly constitute up to 30% of the biovolume and often  
44 make up the majority of filamentous bacteria present (Beer *et al.* 2006; Morgan-  
45 Sagastume, Nielsen and Nielsen 2008; Mielczarek *et al.* 2012). Filamentous bacteria  
46 are generally believed to have structural importance for activated sludge flocs with  
47 good settling properties. However, overgrowth of certain filamentous species is  
48 associated with open and diffuse flocs as well as interfloc bridging, leading to a  
49 sometimes severe operational problem known as bulking (Wanner, Kragelund and  
50 Nielsen 2010). Some Chloroflexi species have also been proposed to be involved in  
51 the stabilization of problematic foams at WWTPs (Kragelund *et al.* 2011) and  
52 membrane fouling in membrane bioreactors (MBRs) (Ziegler *et al.* 2016). In addition,  
53 the high abundance of the Chloroflexi in wastewater treatment systems, often in the  
54 absence of bulking problems, indicates that they make a proportional contribution to  
55 the observed nutrient transformations of these systems. As such, the study of this  
56 phylum has implications for plant operation and our general understanding of the  
57 ecology of wastewater treatment.

58 Relatively little is known about the ecology of the Chloroflexi in nutrient  
59 removal WWTPs. *In situ* studies reveal a preference for the uptake of sugars, and a  
60 high level of surface associated hydrolytic enzymes indicates their involvement in the  
61 breakdown of complex organics (Kragelund *et al.* 2007, 2011; Xia, Kong and Nielsen  
62 2007). Due to poor phylogenetic annotation of the routinely applied taxonomic  
63 databases, studies of activated sludge community dynamics often consider members  
64 of the Chloroflexi phylum as a whole - an approach that ignores the likely phenotypic  
65 diversity among its members (McIlroy *et al.* 2015). An understanding of the ecology  
66 of the phylum and how it relates to system function requires the identification and *in*  
67 *situ* characterization of the abundant genus-level phylotypes present.

68 Historically, the identification of bulking filaments has relied on classification  
69 keys based on morphological characteristics, with most morphotypes identified by an  
70 Eikelboom number (Eikelboom 2000; Jenkins, Richard and Daigger 2004). More  
71 recent phylogenetic identification of these filaments has relied on 16S rRNA gene-  
72 based clone library analyses coupled with fluorescent *in situ* hybridization (FISH) of  
73 plants with severe filamentous bulking. Most of the antecedent morphotypes are  
74 possessed by members of the Chloroflexi and include: 1851 (Beer *et al.* 2002); 0092  
75 (Speirs *et al.* 2009); 0803 (Kragelund *et al.* 2011; Speirs, Tucci and Seviour 2015);  
76 0914 (Speirs *et al.* 2011); 0041/0675 (Speirs *et al.* 2017), and several others  
77 (Kragelund *et al.* 2009) - noting that organisms possessing the same filamentous  
78 morphotype are often unrelated (Seviour *et al.* 1997; Speirs, Tucci and Seviour 2015),  
79 and closely related organisms can also possess different morphotypes (Speirs *et al.*  
80 2017). FISH probes available for known phylotypes reportedly cover many of the  
81 Chloroflexi present, but there is still a substantial portion of the phylum without  
82 genus-level probes (up to 90% by FISH in some plants) (Kragelund *et al.* 2011). The  
83 recent extensive MiDAS 16S rRNA gene amplicon sequencing-based survey,

84 covering >50 Danish full-scale WWTPs over a 10 year period, has given a  
85 comprehensive overview of the abundant core members of the full-scale activated  
86 sludge treatment plants (McIlroy *et al.* 2015). As such, we are now able to  
87 systematically target the numerically important Chloroflexi phylotypes. The *in situ*  
88 physiology of some of these groups, such as ‘*Candidatus Promineofilum*’ (the B45  
89 group) (McIlroy *et al.* 2016) and P2CN44 (Kragelund *et al.* 2011), has been  
90 determined, but several abundant phylotypes are novel and known only by their 16S  
91 rRNA gene sequence (McIlroy *et al.* 2015).

92 The aim of this study is to determine the *in situ* physiology of selected  
93 abundant novel Chloroflexi activated sludge phylotypes. The extensive MiDAS  
94 survey of full-scale Danish nutrient removal activated sludge plants was used to  
95 identify the most abundant genus-level taxa belonging to the phylum Chloroflexi.  
96 FISH probes were designed for these phylotypes and applied in combination with  
97 microautoradiography (MAR) and histochemical staining for their *in situ*  
98 characterization.

## 99 **Methods**

### 100 *Biomass sampling and fixation for FISH*

101 Biomass samples from the aerobic stage of selected full-scale activated sludge  
102 WWTPs with nutrient removal were fixed with 4% paraformaldehyde (PFA) for 3 h  
103 at 4°C. After fixation, samples were washed 3 times in sterile filtered tap water, re-  
104 suspended in 50% ethanol in 1 x PBS solution [v/v], and stored at -20 °C. For basic  
105 operational information for WWTPs sampled in this study, see Mielczarek *et al.*,  
106 (2013).

### 107 *Phylogenetic analysis and FISH probe design*

108 Phylogenetic analysis and FISH probe design were performed with the ARB software  
109 package (Ludwig *et al.* 2004) with the MiDAS database (Release 2.1), which is a  
110 version of the SILVA database (Release 123 NR99) (Quast *et al.* 2013) curated for  
111 activated sludge and anaerobic digester sequences (McIlroy *et al.* 2015, 2017b).  
112 Potential probes were assessed *in silico* with the mathFISH software (Yilmaz,  
113 Parnerkar and Noguera 2011). The Ribosomal Database Project (RDP) PROBE  
114 MATCH function (Cole *et al.* 2014) was used to identify non-target sequences with  
115 indels (McIlroy *et al.* 2011). Probe validation and optimization were based on  
116 generated formamide dissociation curves (Daims, Stoecker and Wagner 2005), where  
117 average relative fluorescent intensities of at least 50 cells calculated with ImageJ  
118 software (National Institutes of Health, Maryland, USA) were measured for varied  
119 hybridization buffer formamide concentration in increments of 5% (v/v) over a range  
120 of 0-65% (v/v) (data not shown). Details for probes designed in this study have been  
121 deposited in the ProbeBase database (Greuter *et al.* 2016).

### 122 *FISH*

123 FISH was performed as detailed by Daims *et al.*, (2005) using the probes designed in  
124 this study as well as CFX197 and CFX223, targeting ‘*Ca. Promineofilum*’ (Speirs *et*

125 *al.* 2009); CFX1223 (Björnsson *et al.* 2002), and GNSB941 (Gich, Garcia-Gil and  
126 Overmann 2001), applied as a mix to target the phylum Chloroflexi; EUB-338-I,  
127 EUB338-II, and EUB338- III (Amann *et al.* 1990; Daims *et al.* 1999), applied as a  
128 mix (EUBmix) to cover all bacteria; NON-EUB as a negative control for  
129 hybridization (Wallner, Amann and Beisker 1993). The hybridization conditions  
130 applied for each probe are given in **Table 1** or as recommended in their original  
131 publications. Quantitative FISH (qFISH) biovolume fractions of individual  
132 Chloroflexi genera were calculated as a percentage area of the total biovolume,  
133 hybridizing the EUBmix probes, that also hybridizes with the specific probe. qFISH  
134 analyses were based on 25 fields of view taken at 630 x magnification using the  
135 Daime image analysis software (Daims, Lückner and Wagner 2006). Microscopic  
136 analysis was performed with an Axioskop epifluorescence microscope (Carl Zeiss,  
137 Oberkochen, Germany), an LSM510 Meta laser scanning confocal microscope (Carl  
138 Zeiss), and a white light laser confocal microscope (Leica TCS SP8 X).

### 139 *Morphological classification*

140 Microscopic observations of wet mount preparations and Gram and Neisser staining  
141 were performed according to the methods of Eikelboom (2000). Morphotype  
142 classification was carried out conforming to the described classification keys, based  
143 on morphological features of the filaments: shape, length, and diameter of filamentous  
144 bacteria, motility, presence of branching, attached growth of other bacteria to the  
145 filaments, (visible or not visible) septa between adjoining cells, shape of cells,  
146 presence of a sheath and sulphur granules (Eikelboom 2000).

### 147 *Histochemical staining*

148 Following FISH, polyphosphate inclusions were stained with 28  $\mu\text{M}$  4',6-diamidino-  
149 2-phenylindole (DAPI) for 1 h at 4°C in the dark. After staining at such relatively  
150 high DAPI concentrations, the polyphosphate granules appear bright yellow with  
151 fluorescence microscopy (Streicher, Golecki and Schon 1990).  
152 Polyhydroxyalkanoates (PHA) were stained with 1% [w/v] Nile Blue A for 10 mins at  
153 55°C essentially as described previously (Ostle and Holt 1982). FISH images were  
154 acquired prior to staining and the same fields of view relocated.

### 155 *Microsphere adhesion to cells (MAC)*

156 MAC was performed on a sample of fresh sludge to identify the hydrophobicity of  
157 target cells, applying the method of Kragelund and colleagues (2005) using a  
158 sonicated solution of 0.2  $\mu\text{m}$  FluoSpheres fluorescent sulphate-modified microspheres  
159 with excitation and emission properties (505/515 nm) (Life Technologies  
160 Corporation, Eugene OR, USA).

### 161 *Microautoradiography*

162 Biomass was sampled from the aerobic stage of full-scale activated sludge WWTPs in  
163 Aalborg West, Bjergmarken, Ringkøbing, and Odense North-West, Denmark. All  
164 plants are designed for N removal and enhanced biological phosphorus removal  
165 (EBPR) and have stable performance. For further details on the plants assessed in this

166 study, see Mielczarek *et al.*, (2013). Biomass samples were stored at 4°C and all  
167 incubations performed within 24 h from sampling. The MAR incubation protocol was  
168 based on the method of Nierychlo *et al.*, (2015). Activated sludge was aerated for 40  
169 min at room temperature prior to MAR incubation to reduce the residual substrates,  
170 oxygen, and NO<sub>x</sub> present. Sludge was then diluted with filtered sludge water from the  
171 same plant to yield a biomass concentration of 1 mgSSmL<sup>-1</sup> and transferred to 11 ml  
172 serum bottles. Radiolabeled substrates were added to yield a total radioactivity of 10  
173 μCi mg<sup>-1</sup> SS. The following substrates were used: [<sup>3</sup>H]acetate, [<sup>3</sup>H]galactose  
174 (Amersham Biosciences, UK), [<sup>3</sup>H]glucose, [<sup>3</sup>H]mannose, [<sup>14</sup>C]pyruvate (Perkin-  
175 Elmer, Waltham MA, USA), [<sup>3</sup>H]amino acid mix, [<sup>14</sup>C]butyric acid, [<sup>3</sup>H]fructose,  
176 [<sup>3</sup>H]glycerol, [<sup>3</sup>H]ethanol, [<sup>3</sup>H]lactate, [<sup>3</sup>H]NAG, [<sup>14</sup>C]propionate (American  
177 Radiolabeled Chemicals Inc., Saint Louis MO, USA). The corresponding cold  
178 substrate was added to yield a total concentration of 2 mM organic substrate. To  
179 achieve anaerobic conditions, prior to substrate addition, oxygen was removed by  
180 repeated evacuation of the headspace and subsequent injection of O<sub>2</sub>-free N<sub>2</sub>.  
181 Anaerobic incubations with selected substrates were supplemented with 0.5 mM  
182 nitrite or 2 mM nitrate to assess their use as electron acceptors. The supernatant  
183 concentrations were monitored using Quantofix Nitrate/Nitrite strips (Macherey-  
184 Nagel, Düren, Germany) and readjusted to their initial concentrations anaerobically to  
185 prevent exhaustion. Samples were incubated for 3 h at room temperature (approx.  
186 21°C) on a rotary shaker at 250 rpm. Incubations with [<sup>14</sup>C]carbonate (American  
187 Radiolabeled Chemicals Inc., Saint Louis MO, USA) contained 20 μCi mg<sup>-1</sup> SS of  
188 radiolabeled substrate. 1mM NH<sub>4</sub>Cl was added to half of the incubations to  
189 investigate ammonia and nitrite (produced from the oxidation of added ammonia)  
190 oxidation activity. These samples were incubated aerobically (same conditions as  
191 above) for 5h, as suggested by Daims *et al.*, (2001). A pasteurized biomass (heated to  
192 70°C for 10 min) incubation was prepared as a negative control to assess possible  
193 silver grain formation due to chemography. Incubations were terminated by the  
194 addition of cold PFA to a final concentration of 4% [w/v]. Samples were fixed for 3 h  
195 at 4°C and subsequently washed 3 times with sterile filtered tap water. Aliquots of 30  
196 μl of the biomass were gently homogenized between glass coverslips. Following  
197 FISH (see earlier), coverslips were coated with Ilford K5D emulsion (Polysciences,  
198 Inc., Warrington, PA, USA), exposed in the dark for periods of 10 days, and  
199 developed with Kodak D-19 developer.

## 200 **Results**

### 201 *Distribution of Chloroflexi in Danish full-scale WWTPs*

202 Phylogenetic tree based on 16S rRNA gene sequences shows all the abundant  
203 Chloroflexi groups found in Danish WWTPs with nutrient removal and their  
204 phylogenetic relationship (**Figure 1**). The Chloroflexi phylum is among the most  
205 abundant phyla in full-scale systems in Denmark, constituting on average 10.6% of  
206 the total reads across all plants (**Figure 2A**). The Chloroflexi classes Anaerolineae,  
207 Caldilineae, Ardenticatenia, and SJA-15 made up the majority of members of the



208 phylum present (**Figure 1B**). All the abundant genus-level phylotypes (**Figure 1C**)  
209 are novel, having no available cultured representatives, and were initially given  
210 provisional alphanumeric names in the MiDAS database (McIlroy *et al.* 2015) (not  
211 shown here). Based on their characterization, as presented in this study and previous  
212 publications, we propose new, previously unpublished, candidate names (Murray and  
213 Stackebrandt 1995). These names have been incorporated into the MiDAS taxonomy  
214 version 2.1 (McIlroy *et al.* 2015) and are used throughout this report. These include:  
215 ‘*Candidatus Sarcinithrix*’ (Sar.ci'ni.thrix. L. fem. n. *sarcina* a package, bundle; Gr.  
216 fem. n. *thrix* hair; N.L. fem. n. *Sarcinithrix* a hair bundle; formerly *Candidatus*  
217 *Sarcinathrix* (release 2.1)), ‘*Candidatus Villigracilis*’ (Vil.li.gra'ci.lis. L. masc.  
218 n. *villus* a tuft of hair; L. adj. *gracilis* slim, slender; N.L. fem. n. *Villigracilis* a slender  
219 tuft of hair; formerly MiDAS taxon SBR1029 (release 1.21) and *Candidatus*  
220 *Villogracilis* (release 2.1)), ‘*Candidatus Defluviifilum*’ (De.flu.vi.i.fi'lum. L. neut.  
221 n. *defluvium* sewage; L. neut. n. *filum* a thread; N.L. neut. n. *Defluviifilum* a thread  
222 from sewage; formerly MiDAS taxon P2CN44 (release 1.21)), and ‘*Candidatus*  
223 *Amarolinea*’ (A.ma.ro.li'ne.a. Gr. fem. n. *amara* conduit, channel, sewer; L. fem.  
224 n. *linea* a thread, a line; N.L. fem. n. *Amarolinea* a thread from a sewer; formerly  
225 MiDAS taxon C10\_SB1A (release 1.21) and *Candidatus Amarilinum* (release 2.1)).  
226 ‘*Kouleothrix* spp.’, possessing the 1851 bulking filament morphotype, was present in  
227 low abundance with a median and mean of 0.04 and 0.4%, respectively. ‘*Ca.*  
228 *Defluviifilum*’, ‘*Ca. Promineofilum*’, ‘*Ca. Villigracilis*’, and ‘*Ca. Sarcinithrix*’  
229 represent the four most abundant genera by median read abundance (**Figure 1C**),  
230 collectively constituting on average 6.2% of the total reads across all Danish plants  
231 assessed in this study. These phylotypes were relatively stably present across the  
232 different WWTPs (**Figure S1**) and therefore represent core members of the microbial  
233 community of these systems. As little is known regarding the physiology of the latter  
234 two genera, they were selected for a detailed characterization in this study. Relative to  
235 these phylotypes, the ‘*Ca. Amarolinea*’ showed a much more dynamic distribution  
236 and periodically reached abundances in excess of 30% of the amplicon reads, which  
237 would indicate a likely role in bulking episodes in Denmark. As such, this genus,  
238 known only by its 16S rRNA gene sequences, was also selected for characterization  
239 in this study.

#### 240 *Phylogeny and FISH probe design*

241 ‘*Ca. Villigracilis*’ are members of the Anaerolineaceae, which is currently the sole  
242 family of the class Anaerolineae in the MiDAS and SILVA taxonomies. These  
243 sequences fall within order SBR1031 in the Greengenes taxonomy (McDonald *et al.*  
244 2012). The CFX763A and CFX763B probes were designed to cover separate sub-  
245 groups (A and B) of the ‘*Ca. Villigracilis*’ (**Figure S2**) - collectively covering >60%  
246 of the MiDAS database sequences classified to the genus. The target region is not  
247 covered by the V1-3 region amplicon sequences, although both probes match the full-  
248 length database sequences most closely related to the abundant OTU sequences (data  
249 not shown). When applied to full-scale activated sludge biomass, both probes  
250 hybridized thin filaments (0.3-0.4  $\mu\text{m}$  wide and 15-50  $\mu\text{m}$  long) that were often

251 observed in bundles and almost exclusively located within the flocs. The  
252 CFX763AB\_H1A and CFX763AB\_H1B helper probes are recommended to give  
253 optimal fluorescence signal for both probes. Amplicon sequencing of the V1-3 region  
254 of the 16S rRNA cannot be used to confidently separate the A and B sub-groups, due  
255 to high sequence similarity, but qFISH indicates that the former is the more  
256 numerically important of the two.

257 The '*Ca. Amarolinea*' genus falls within the novel MiDAS Chloroflexi class-  
258 level-group SJA-15, together with the also abundant genus '*Ca. Sarcinithrix*' (**Figure**  
259 **2**). A probe to cover the entire '*Ca. Amarolinea*' group was not identified, so the  
260 CFX64 (**Table 1**) was designed for the abundant amplicon OTUs (OTU\_3 and  
261 OTU\_4592, **Figure S3**) and the most closely related full-length database sequence  
262 (AF513086). These sequences share >97% similarity. As the probe covers these  
263 abundant OTUs, it should cover the majority of members of the genus in full-scale  
264 activated sludge in Denmark. When applied to activated sludge, the probe hybridized  
265 exclusively to filamentous bacteria (see later for a detailed description of their  
266 morphology). A strong positive signal was obtained without addition of designed  
267 unlabeled helper probes CFX64\_H1 and CFX64\_H2 (**Table 1**), which did not  
268 noticeably improve fluorescent signal (data not shown). The '*Ca. Amarolinea*'  
269 filaments constituted up to 30% of the community biovolume in some full-scale  
270 WWTPs in Denmark - confirming their high abundance with amplicon sequencing  
271 (see **Table 2**).

272 FISH probes are already available to target the '*Ca. Sarcinithrix*' (CFX67),  
273 which was shown to possess the Eikelboom 0914 morphotype in nutrient removal  
274 activated sludge systems in Australia (Speirs *et al.* 2011). Application of CFX67  
275 probe did not give significant positive fluorescence to bacterial cells in Danish plants.  
276 The probe misses several full-length sequences classified to the genus and does not  
277 cover any of the abundant OTU sequences (>0.1% average read abundance in at least  
278 1 plant) from the MiDAS full-scale survey. As such, two new probes were designed  
279 to give better coverage of the clade. The designed CFX449 and CFX1151 individually  
280 target 85% of the full-length database sequences. As such, they can be applied with  
281 different fluorochromes to confirm specific coverage of the genus, or together as a  
282 mix to give higher signal (**Figure S4**). Helper probes were not required for either  
283 probe, but did give a more even signal over the filament, which was also reported by  
284 Speirs *et al.* (2011) for the CFX67 probe. The few filaments positive for the CFX67  
285 probe in the Danish WWTPs assessed in this study also hybridized the CFX449 and  
286 CFX1151 probes (**Figure S4**). Quantitative FISH values with the CFX449 and  
287 CFX1151 were similar to amplicon-sequencing based estimates (**Table 2**).

288 All three phylotypes studied gave positive hybridization signal with the  
289 EUBmix probe set, which is commonly applied as a universal probe targeting bacteria  
290 (EUB338, EUB338-II, and EUB338-III). This is of interest, given that many  
291 Chloroflexi reportedly lack the target site for the EUBmix probe set and fail to  
292 hybridize the probe *in situ* (Kragelund *et al.* 2007, 2011; Speirs *et al.* 2009). Most 16S  
293 rRNA gene sequences of the '*Ca. Amarolinea*', '*Ca. Sarcinithrix*' and '*Kouleothrix*'  
294 contain the site for the EUB338 probe, the '*Ca. Villigracilis*' sequences possess the



295 EUB338-III site, and all groups have been shown to hybridize the probe *in situ*. Most  
296 members of the ‘*Ca. Defluviifilum*’ have one mismatch, though *in silico* analysis with  
297 the MathFISH software (Yilmaz, Parnerkar and Noguera 2011) predicts positive  
298 binding (with a calculated melting formamide point ( $[\Delta FA]_m$ ) of 50%), which is  
299 confirmed *in situ* for filaments hybridizing the T0803-0654 probe designed to target  
300 the group (Kragelund *et al.* 2011). Thus, of the abundant phylotypes, only the ‘*Ca.*  
301 *Promineofilum*’ genus is not covered by the EUBmix probe set (Speirs *et al.* 2009).

### 302 *Morphological description and classification*

303 The morphological properties of the CFX64 positive filaments, representing the ‘*Ca.*  
304 *Amarolinea*’ genus, were investigated in detail for association to a morphotype of the  
305 well-known antecedent classification systems (Eikelboom 1975). Though not clearly  
306 visible, the cells appeared to be rectangular with no visible septa, a trichome  
307 thickness of 1.0-2.2  $\mu\text{m}$ , and a length in the 20-140  $\mu\text{m}$  range. They were non-motile,  
308 Gram stain negative, with no branching or attached growth. The whole filaments  
309 stained blue/violet with the Neisser stain, with no visible volutin granules. Excess  
310 polyphosphate stores were not observed with DAPI staining. Cells did not appear to  
311 contain excess stores of polyhydroxyalkanoates (PHAs), with negative results with  
312 Nile blue A staining and only small positive granules observed with the Sudan black  
313 stain. From these observations, primarily based on the characteristic violet color of  
314 the cells after Neisser staining, it is suggested that the morphology of the filament is  
315 most consistent with the Eikelboom type 0092 morphotype (Eikelboom 2000). The  
316 ‘*Ca. Promineofilum*’ also reportedly has the 0092 morphotype (Speirs *et al.* 2009),  
317 but there was no observed overlap between the CFX64 and the CFX197 probes  
318 targeting the ‘*Ca. Amarilimum*’ and ‘*Ca. Promineofilum*’ genera, respectively  
319 (**Figure S5**). The ‘*Ca. Promineofilum*’ phylotype is also thinner in appearance, with a  
320 trichome diameter of approx. 0.8  $\mu\text{m}$  (Speirs *et al.* 2009). Very few of the fluorescent  
321 sulphate modified microspheres attached to the CFX64 positive filaments (data not  
322 shown), indicating that they do not have a hydrophobic surface and are likely not  
323 involved in foam formation.

324 Morphological descriptions are already reported for members of the ‘*Ca.*  
325 *Sarcinithrix*’ (Speirs *et al.* 2011) and ‘*Ca. Defluviifilum*’ (Kragelund *et al.* 2011;  
326 Speirs *et al.* 2017). The surface hydrophobicity of ‘*Ca. Sarcinithrix*’ was assessed for  
327 the first time here, where it was determined to be hydrophilic and therefore unlikely to  
328 be involved in foam formation. Morphological classification of the ‘*Ca. Villigracilis*’  
329 was not successful due to their location within the floc, making interpretation of  
330 staining analyses difficult.

### 331 *In situ substrate uptake*

332 The results for substrate uptake by probe-defined ‘*Ca. Villigracilis*’ sub-groups A and  
333 B, ‘*Ca. Amarolinea*’, and ‘*Ca. Sarcinithrix*’ using MAR-FISH under various  
334 conditions are shown in **Table S1**, and a summary of known *in situ* traits of abundant  
335 *Chloroflexi* is given in **Table 3**. ‘*Ca. Villigracilis*’ sub-group A, ‘*Ca. Amarolinea*’,  
336 and ‘*Ca. Sarcinithrix*’ only utilized sugars of the 13 substrates tested, consistent with

337 other characterized Chloroflexi genera. The phylotypes differed in the types of sugars  
338 taken up, noting that variation was also observed within the ‘*Ca. Amarolinea*’ genus –  
339 with some filaments strongly positive and others clearly negative for fructose uptake.  
340 ‘*Ca. Villigracilis*’ sub-group B filaments were negative for all substrates and  
341 conditions. It may be that they have a relatively lower activity than the much more  
342 abundant sub-group A filaments that is below the detection of MAR. Further analyses  
343 are required to assess the reason for the observed lack of substrate uptake. All three  
344 genera were able to take up substrates under anoxic conditions, suggesting  
345 fermentative metabolisms. Anoxic uptake of sugars in presence of nitrate/nitrite was  
346 also observed, but their potential for denitrification is unclear, given that uptake was  
347 also observed without nitrate/nitrite addition. The same ambiguous results were  
348 obtained for the ‘*Ca. Defluviifilum*’ (Kragelund *et al.* 2011). The ability for  
349 nitrification was also assessed for these groups in this study, given that *Nitrolancetus*  
350 *hollandicus*, a nitrite oxidizing member of the class Thermomicrobia of the  
351 Chloroflexi, was isolated from activated sludge (Sorokin *et al.* 2012); albeit in a  
352 different class to the abundant members of the Chloroflexi Danish full-scale systems.  
353 None of the genera appeared to be behaving as nitrifiers, with no observed uptake of  
354 labeled CO<sub>2</sub> in the presence of ammonia (**Table 3 and S1**), while a positive MAR  
355 signal was noted for *Nitrosomonas* as well as *Nitrospira*, targeted by the probe  
356 Cluster6a\_192 (Adamczyk *et al.* 2003) and Ntsp662 (Daims *et al.* 2001), respectively.

## 357 **Discussion**

358 The results of this study of the distribution and *in situ* morphology and physiology of  
359 individual abundant phylotypes of the phylum Chloroflexi give valuable insight into  
360 their potential importance to the operation of WWTPs. The ‘*Ca. Promineofilum*’, ‘*Ca.*  
361 *Defluviifilum*’, ‘*Ca. Villigracilis*’, and ‘*Ca. Sarcinithrix*’ appear to be consistently  
362 abundant filamentous members of the full-scale WWTP community, where they  
363 certainly make an important contribution to the bulk nutrient transformations.  
364 Relative to other abundant Chloroflexi genera, the distribution of the ‘*Ca.*  
365 *Amarolinea*’ is much more dynamic, reaching levels of >30% of the biovolume in  
366 some plants. As such, it is more likely that the ‘*Ca. Amarolinea*’ are responsible for  
367 acute bulking episodes in Danish WWTPs, while other abundant phylotypes are core  
368 members of the community that are possibly important to floc structure and the  
369 breakdown of organics (see later). While the ‘*Ca. Villigracilis*’ are filamentous, they  
370 are almost exclusively found within the flocs and are unlikely to contribute to bulking  
371 episodes. This observation explains why they have never been detected before and  
372 highlights the value of large-scale full-scale surveys, such as MiDAS, for describing  
373 the abundant members of wastewater treatment systems and the importance of *in situ*  
374 analyses to evaluate the role of organisms in floc structure and settleability. In  
375 addition to a potential contribution to bulking, members of the ‘*Ca. Promineofilum*’  
376 are also putatively involved in membrane fouling in MBR systems (Ziegler *et al.*  
377 2016), and ‘*Ca. Defluviifilum*’ has a hydrophobic cell surface that has been

378 implicated in the stabilization of problematic foams on the surface of reactor tanks  
379 (Kragelund *et al.* 2011).

380 In recent studies Speirs *et al.*, (2015; 2017) described filamentous Chloroflexi  
381 phylotypes in Australian WWTPs possessing the bulking Eikelboom morphotypes  
382 0803 and 0041/0675 that are commonly observed by light microscopy in Danish  
383 plants (Mielczarek *et al.* 2012). These phylotypes classified within the Anaerolineae  
384 and Caldilineae, respectively. However, none of these were found to be abundant in  
385 the amplicon based survey of Danish systems (data not shown). Their FISH probe  
386 defined 0675 phylotype falls within the MiDAS defined ‘*Ca. Defluviifilum*’ genus (v.  
387 2.1), shown previously to possess the Eikelboom 0803 phylotype (Kragelund *et al.*  
388 2011), which they suggest should be split into a separate genus based on the  
389 divergence of its 16S rRNA gene sequence (only *Ca.* 90% similar). Further  
390 characterisation of members of the current ‘*Ca. Defluviifilum*’ clade, including  
391 obtaining representative genomes, will help to resolve the phylogeny of these  
392 organisms. Members of the ‘*Kouleothrix*’ genus, shown to possess the Eikelboom  
393 1851 bulking morphotype (Beer *et al.* 2002; Kohno, Sei and Mori 2002), were also  
394 relatively low in abundance in Danish plants (Kragelund *et al.* 2011) but are common  
395 in other countries – such as Japan, where they have been suggested as a major  
396 contributor to filamentous bulking episodes (Nittami *et al.* 2017). Global surveys will  
397 help to establish how relevant the abundant Danish phylotypes characterised in this  
398 paper are worldwide.

399 The abundant phylotypes in Danish WWTPs appear to be  
400 organoheterotrophic, fermentative, facultative anaerobes. This is suggested from their  
401 exclusive utilization of sugars and ability for anaerobic carbon uptake. Fermentative  
402 pathways were also annotated in the sole genome from these genera – ‘*Ca.*  
403 *Promineofilum breve*’ (McIlroy *et al.* 2016). The physiology determined for the ‘*Ca.*  
404 *Defluviifilum*’ and ‘*Ca. Villigracilis*’ is consistent with other members of their  
405 respective classes (Caldilineae and Anaerolineae), which are mostly fermentative  
406 organoheterotrophic filaments growing on sugars and/or amino acids (Sekiguchi *et al.*  
407 2003; Yamada *et al.* 2006, 2007; Grégoire *et al.* 2011; Nunoura *et al.* 2013;  
408 Podosokorskaya *et al.* 2013; Imachi *et al.* 2014; McIlroy *et al.* 2017a). ‘*Ca.*  
409 *Villigracilis*’ is the first reported facultative anaerobic genus of the Anaerolineae, with  
410 all isolates of other described genera being obligate anaerobes.

411 In addition to the likely fermentation of sugars by the abundant Chloroflexi,  
412 metabolic diversity within the less abundant members of the phylum is evident – with  
413 reported assimilation of short and long chain fatty acids, amino acids, and glycerol  
414 (**Table 3**). Some members of the phylum also appear unable to take up substrates  
415 anaerobically and may scavenge sugars released from aerobic breakdown of complex  
416 organic matter. Uptake of *N*-aminoglucosamine (NAG), a component of  
417 peptidoglycan and lipopolysaccharides, for some Chloroflexi, suggests a specific role  
418 in the breakdown of cellular material (Kragelund *et al.* 2007, 2011; Miura, Watanabe  
419 and Okabe 2007). Of the known Chloroflexi genera reportedly abundant in activated  
420 sludge, only the ‘*Kouleothrix*’ genus is seemingly unable to take up substrates

421 anaerobically *in situ* (Kragelund *et al.* 2007), although isolates of the genus are  
422 capable of anaerobic fermentative growth on sugars (Kohno, Sei and Mori 2002).

423 In this study, the most abundant members of the Chloroflexi in Danish nutrient  
424 removal WWTPs were identified and their ecophysiology described. These  
425 phylotypes appear to differ in their impact on plant operation - with suggested  
426 importance in sludge settleability, foaming, and membrane fouling being associated  
427 with different groups. All abundant members of the phylum likely ferment sugars, and  
428 future research should aim to obtain representative genomes for each in order to carry  
429 out more detailed comparison of their metabolic activities. Such an approach will  
430 explain important questions regarding how these organisms coexist, and what  
431 conditions determine their relative abundances. The FISH probes designed in this  
432 study will allow more hypothesis-based *in situ* investigation of their physiologies,  
433 based on genomic evidence. The taxonomic annotation and design of FISH probes for  
434 the abundant Chloroflexi, in combination with the high throughput nature of 16S  
435 rRNA gene amplicon sequencing, will also allow their routine observation and study.  
436 Defining and naming these novel genus level taxa importantly provides the  
437 foundation, upon which information on their morphology, distribution, and  
438 physiology can be gathered for an in-depth understanding of their ecology and how  
439 this might relate to operational parameters.

#### 440 **Funding**

441 This work was supported by the Danish Council for Independent Research (grant no.  
442 4093-00127A); Innovation Fund Denmark (EcoDesign); The Obel Family  
443 Foundation; Danish wastewater treatment plants in MiDAS; and Aalborg University.

#### 444 **Acknowledgements**

445 We thank K. Vilstrup for help to latin names.

#### 446 **References**

- 447 Adamczyk J, Hesselsoe M, Iversen N *et al.* The Isotope Array, a New Tool That  
448 Employs Substrate-Mediated Labeling of rRNA for Determination of  
449 Microbial Community Structure and Function. *Appl Environ Microbiol*  
450 2003;**69**:6875–87.
- 451 Amann RI, Binder BJ, Olson RJ *et al.* Combination of 16S rRNA-targeted  
452 oligonucleotide probes with flow cytometry for analyzing mixed microbial  
453 populations. *Appl Env Microbiol* 1990;**56**:1919–25.
- 454 Beer M, Seviour EM, Kong Y *et al.* Phylogeny of the filamentous bacterium  
455 Eikelboom Type 1851, and design and application of a 16S rRNA targeted  
456 oligonucleotide probe for its fluorescence in situ identification in activated  
457 sludge. *FEMS Microbiol Lett* 2002;**207**:179–83.

- 458 Beer M, Stratton HM, Griffiths PC *et al.* Which are the polyphosphate accumulating  
459 organisms in full-scale activated sludge enhanced biological phosphate  
460 removal systems in Australia? *J Appl Microbiol* 2006;**100**:223–43.
- 461 Björnsson L, Hugenholtz P, Tyson GW *et al.* Filamentous Chloroflexi (green non-  
462 sulfur bacteria) are abundant in wastewater treatment processes with  
463 biological nutrient removal. *Microbiology* 2002;**148**:2309–18.
- 464 Cole JR, Wang Q, Fish JA *et al.* Ribosomal Database Project: data and tools for high  
465 throughput rRNA analysis. *Nucleic Acids Res* 2014;**42**:D633–42.
- 466 Daims H, Brühl A, Amann R *et al.* The domain-specific probe EUB338 is insufficient  
467 for the detection of all Bacteria: development and evaluation of a more  
468 comprehensive probe set. *Syst Appl Microbiol* 1999;**22**:434–44.
- 469 Daims H, Lückner S, Wagner M. daime, a novel image analysis program for microbial  
470 ecology and biofilm research. *Env Microbiol* 2006;**8**:200–13.
- 471 Daims H, Nielsen JL, Nielsen PH *et al.* In Situ Characterization of Nitrospira-Like  
472 Nitrite-Oxidizing Bacteria Active in Wastewater Treatment Plants. *Appl*  
473 *Environ Microbiol* 2001;**67**:5273–84.
- 474 Daims H, Stoecker K, Wagner M. Fluorescence in situ hybridization for the detection  
475 of prokaryotes. In: Osborn AM, Smith CJ (eds.). *Molecular Microbial*  
476 *Ecology*. New York: Taylor & Francis, 2005, 213–39.
- 477 Eikelboom D. *Process Control of Activated Sludge Plants by Microscopic*  
478 *Investigation*. London: IWA Publishing, 2000.
- 479 Eikelboom DH. Filamentous organisms observed in activated sludge. *Water Res*  
480 1975;**9**:365–88.
- 481 Gich F, Garcia-Gil J, Overmann J. Previously unknown and phylogenetically diverse  
482 members of the green nonsulfur bacteria are indigenous to freshwater lakes.  
483 *Arch Microbiol* 2001;**177**:1–10.
- 484 Grégoire P, Bohli M, Cayol J-L *et al.* *Caldilinea tarbellica* sp. nov., a filamentous,  
485 thermophilic, anaerobic bacterium isolated from a deep hot aquifer in the  
486 Aquitaine Basin. *Int J Syst Evol Microbiol* 2011;**61**:1436–41.
- 487 Greuter D, Loy A, Horn M *et al.* probeBase—an online resource for rRNA-targeted  
488 oligonucleotide probes and primers: new features 2016. *Nucleic Acids Res*  
489 2016;**44**:D586–9.
- 490 Imachi H, Sakai S, Lipp JS *et al.* *Pelolinea submarina* gen. nov., sp. nov., an  
491 anaerobic, filamentous bacterium of the phylum Chloroflexi isolated from  
492 subseafloor sediment. *Int J Syst Evol Microbiol* 2014;**64**:812–8.
- 493 Jenkins D, Richard MG, Daigger GT. *Manual on the Causes and Control of Activated*  
494 *Sludge Bulking, Foaming and Other Solids Separation Problems*. 3 rd.  
495 London, England: CRC Press LLC, 2004.



- 496 Kindaichi T, Nierychlo M, Kragelund C *et al.* High and stable substrate specificities  
497 of microorganisms in enhanced biological phosphorus removal plants. *Environ*  
498 *Microbiol* 2013;**15**:1821–31.
- 499 Kohno T, Sei K, Mori K. Characterization of type 1851 organism isolated from  
500 activated sludge samples. *Water Sci Technol J Int Assoc Water Pollut Res*  
501 2002;**46**:111–4.
- 502 Kragelund C, Levantesi C, Borger A *et al.* Identity, abundance and ecophysiology of  
503 filamentous Chloroflexi species present in activated sludge treatment plants.  
504 *FEMS Microbiol Ecol* 2007;**59**:671–82.
- 505 Kragelund C, Müller E, Schade M *et al.* Identification of filamentous bacteria by  
506 FISH. In: Nielsen PH, Daims H, Lemmer H (eds.). *FISH Handbook for*  
507 *Biological Wastewater Treatment*. London: IWA Publishing, 2009, 33–68.
- 508 Kragelund C, Nielsen JL, Thomsen TR *et al.* Ecophysiology of the filamentous  
509 Alphaproteobacterium *Meganema perideroedes* in activated sludge. *FEMS*  
510 *Microbiol Ecol* 2005;**54**:111–22.
- 511 Kragelund C, Thomsen TR, Mielczarek AT *et al.* Eikelboom’s morphotype 0803 in  
512 activated sludge belongs to the genus *Caldilinea* in the phylum Chloroflexi.  
513 *FEMS Microbiol Ecol* 2011;**76**:451–62.
- 514 Ludwig W, Strunk O, Westram R *et al.* ARB: a software environment for sequence  
515 data. *Nucleic Acids Res* 2004;**32**:1363–71.
- 516 McDonald D, Price MN, Goodrich J *et al.* An improved Greengenes taxonomy with  
517 explicit ranks for ecological and evolutionary analyses of bacteria and archaea.  
518 *ISME J* 2012;**6**:610–8.
- 519 McIlroy SJ, Karst SM, Nierychlo M *et al.* Genomic and in situ investigations of the  
520 novel uncultured Chloroflexi associated with 0092 morphotype filamentous  
521 bulking in activated sludge. *ISME J* 2016;**In press**.
- 522 McIlroy SJ, Kirkegaard RH, Dueholm MS *et al.* Culture-Independent Analyses  
523 Reveal Novel Anaerolineaceae as Abundant Primary Fermenters in Anaerobic  
524 Digesters Treating Waste Activated Sludge. *Front Microbiol* 2017a;**8**, DOI:  
525 10.3389/fmicb.2017.01134.
- 526 McIlroy SJ, Kirkegaard RH, McIlroy B *et al.* MiDAS 2.0: an ecosystem-specific  
527 taxonomy and online database for the organisms of wastewater treatment  
528 systems expanded for anaerobic digester groups. *Database* 2017b;**2017**, DOI:  
529 10.1093/database/bax016.
- 530 McIlroy SJ, Saunders AM, Albertsen M *et al.* MiDAS: the field guide to the microbes  
531 of activated sludge. *Database* 2015;**2015**:1–8.
- 532 McIlroy SJ, Tillett D, Petrovski S *et al.* Non-target sites with single nucleotide  
533 insertions or deletions are frequently found in 16S rRNA sequences and can  
534 lead to false positives in fluorescence in situ hybridization (FISH). *Env*  
535 *Microbiol* 2011;**13**:38–47.

- 536 Mielczarek AT, Kragelund C, Eriksen PS *et al.* Population dynamics of filamentous  
537 bacteria in Danish wastewater treatment plants with nutrient removal. *Water*  
538 *Res* 2012;**46**:3781–95.
- 539 Mielczarek AT, Nguyen HT, Nielsen JL *et al.* Population dynamics of bacteria  
540 involved in enhanced biological phosphorus removal in Danish wastewater  
541 treatment plants. *Water Res* 2013;**47**:1529–44.
- 542 Miura Y, Watanabe Y, Okabe S. Significance of Chloroflexi in performance of  
543 submerged membrane bioreactors (MBR) treating municipal wastewater.  
544 *Environ Sci Technol* 2007;**41**:7787–94.
- 545 Morgan-Sagastume F, Nielsen JL, Nielsen PH. Substrate-dependent denitrification of  
546 abundant probe-defined denitrifying bacteria in activated sludge. *FEMS*  
547 *Microbiol Ecol* 2008;**66**:447–61.
- 548 Murray RG, Stackebrandt E. Taxonomic note: implementation of the provisional  
549 status Candidatus for incompletely described procaryotes. *Int J Syst Bacteriol*  
550 1995;**45**:186–7.
- 551 Nierychlo M, Nielsen JL, Nielsen PH. Studies of the Ecophysiology of Single Cells in  
552 Microbial Communities by (Quantitative) Microautoradiography and  
553 Fluorescence In Situ Hybridization (MAR-FISH). In: McGenity TJ, Timmis  
554 KN, Nogales Fernández B (eds.). *Hydrocarbon and Lipid Microbiology*  
555 *Protocols, Springer Protocols Handbooks*. 1st ed. Berlin-Heidelberg:  
556 Springer-Verlag, 2015.
- 557 Nittami T, Speirs LBM, Yamada T *et al.* Quantification of *Chloroflexi* Eikelboom  
558 morphotype 1851 for prediction and control of bulking events in municipal  
559 activated sludge plants in Japan. *Appl Microbiol Biotechnol* 2017;**101**:3861–9.
- 560 Nunoura T, Hirai M, Miyazaki M *et al.* Isolation and characterization of a  
561 thermophilic, obligately anaerobic and heterotrophic marine Chloroflexi  
562 bacterium from a Chloroflexi dominated microbial community associated with  
563 a Japanese shallow hydrothermal system, and proposal for Thermomarinilin.  
564 *Microbes Environ JSME* 2013;**28**:228–35.
- 565 Ostle AG, Holt JG. Nile blue A as a fluorescent stain for poly-beta-hydroxybutyrate.  
566 *Appl Env Microbiol* 1982;**44**:238–41.
- 567 Podosokorskaya OA, Bonch-Osmolovskaya EA, Novikov AA *et al.* Ornatilinea  
568 apprima gen. nov., sp. nov., a cellulolytic representative of the class  
569 Anaerolineae. *Int J Syst Evol Microbiol* 2013;**63**:86–92.
- 570 Quast C, Pruesse E, Yilmaz P *et al.* The SILVA ribosomal RNA gene database  
571 project: improved data processing and web-based tools. *Nucleic Acids Res*  
572 2013;**41**:D590–6.
- 573 Sekiguchi Y, Yamada T, Hanada S *et al.* Anaerolinea thermophila gen. nov., sp. nov.  
574 and Caldilinea aerophila gen. nov., sp. nov., novel filamentous thermophiles  
575 that represent a previously uncultured lineage of the domain Bacteria at the  
576 subphylum level. *Int J Syst Evol Microbiol* 2003;**53**:1843–51.

- 577 Seviour EM, Blackall LL, Christensson C *et al.* The filamentous morphotype  
578 Eikelboom Type 1863 is not a single genetic entity. *J Appl Microbiol*  
579 1997;**82**:411–21.
- 580 Sorokin DY, Lückner S, Vejmekova D *et al.* Nitrification expanded: discovery,  
581 physiology and genomics of a nitrite-oxidizing bacterium from the phylum  
582 Chloroflexi. *ISME J* 2012;**6**:2245–56.
- 583 Speirs L, Nittami T, McIlroy S *et al.* Filamentous bacterium Eikelboom type 0092 in  
584 activated sludge plants in Australia is a member of the phylum Chloroflexi.  
585 *Appl Env Microbiol* 2009;**75**:2446–52.
- 586 Speirs LBM, Dyson ZA, Tucci J *et al.* Eikelboom filamentous morphotypes 0675 and  
587 0041 embrace members of the Chloroflexi: resolving their phylogeny, and  
588 design of fluorescence in situ hybridisation probes for their identification.  
589 *FEMS Microbiol Ecol* 2017;**93**, DOI: 10.1093/femsec/fix115.
- 590 Speirs LBM, McIlroy SJ, Petrovski S *et al.* The activated sludge bulking filament  
591 Eikelboom morphotype 0914 is a member of the Chloroflexi. *Env Microbiol*  
592 *Rep* 2011;**3**:159–65.
- 593 Speirs LBM, Tucci J, Seviour RJ. The activated sludge bulking filament Eikelboom  
594 morphotype 0803 embraces more than one member of the *Chloroflexi*. Stams  
595 A (ed.). *FEMS Microbiol Ecol* 2015;**91**:fiv100.
- 596 Streichan M, Golecki JR, Schon G. Polyphosphate-accumulating bacteria from  
597 sewage plants with different processes for biological phosphorus removal.  
598 *FEMS Microbiol Lett* 1990;**73**:113–24.
- 599 Wallner G, Amann R, Beisker W. Optimizing fluorescent in situ hybridization with  
600 rRNA-targeted oligonucleotide probes for flow cytometric identification of  
601 microorganisms. *Cytometry* 1993;**14**:136–43.
- 602 Wanner J, Kragelund C, Nielsen PH. Microbiology of bulking. In: Seviour RJ,  
603 Nielsen PH (eds.). *Microbial Ecology of Activated Sludge*. London: IWA  
604 Publishing, 2010, 191–214.
- 605 Xia Y, Kong Y, Nielsen PH. In situ detection of protein-hydrolysing microorganisms  
606 in activated sludge. *FEMS Microbiol Ecol* 2007;**60**:156–65.
- 607 Yamada T, Imachi H, Ohashi A *et al.* *Bellilinea caldifistulae* gen. nov., sp. nov. and  
608 *Longilinea arvoryzae* gen. nov., sp. nov., strictly anaerobic, filamentous  
609 bacteria of the phylum Chloroflexi isolated from methanogenic propionate-  
610 degrading consortia. *Int J Syst Evol Microbiol* 2007;**57**:2299–306.
- 611 Yamada T, Sekiguchi Y, Hanada S *et al.* *Anaerolinea thermolimosa* sp. nov.,  
612 *Levilinea saccharolytica* gen. nov., sp. nov. and *Leptolinea tardivitalis* gen.  
613 nov., sp. nov., novel filamentous anaerobes, and description of the new classes  
614 *Anaerolineae* classis nov. and *Caldilineae* classis nov. in the . *Int J Syst Evol*  
615 *Microbiol* 2006;**56**:1331–40.

- 616 Yilmaz LS, Parnerkar S, Noguera DR. mathFISH, a web tool that uses  
617 thermodynamics-based mathematical models for in silico evaluation of  
618 oligonucleotide probes for fluorescence in situ hybridization. *Appl Env*  
619 *Microbiol* 2011;**77**:1118–22.
- 620 Ziegler AS, McIlroy SJ, Larsen P *et al.* Dynamics of the Fouling Layer Microbial  
621 Community in a Membrane Bioreactor. *PloS One* 2016;**11**:e0158811.
- 622

## 623 **Figures and Tables**

624 **Figure 1.** Maximum-likelihood (PhyML) 16S rRNA gene phylogenetic tree of  
625 abundant activated sludge phylotypes (bold typeface) and isolated members of the  
626 phylum Chloroflexi. The alignment used for the tree applied a 20% conservational  
627 filter to remove hypervariable positions, giving 1108 aligned positions. Phylogenetic  
628 classification is indicated with black brackets and is based on the MiDAS database  
629 (Release 2.1). Probe coverage of probes relevant to the current study is shown with  
630 red coloured brackets. Associated activated sludge morphotypes of previously  
631 described phylotypes are designated with blue coloured brackets. Bootstrap values  
632 from 100 resamplings are indicated for branches with >50% (white dot), 50-70%  
633 (gray), and >90% (black) support. Species of the phylum Cyanobacteria were used as  
634 the outgroup. The scale bar represents substitutions per nucleotide base.

635 **Figure 2.** Distribution of Chloroflexi in 25 full-scale activated sludge WWTPs  
636 sampled 2-4 times per year from 2006 to 2015. (a) 10 most abundant phyla in Danish  
637 WWTPs. (b) 10 most abundant Chloroflexi classes in Danish WWTPs (c) 10 most  
638 abundant Chloroflexi genera in Danish WWTPs. X-axis shows the relative read  
639 abundance in percentage of total bacteria.

640 **Figure 3.** Composite FISH micrographs of novel Chloroflexi genera in full-scale  
641 activated sludge. Specific probes (Cy3-label, red) target (a) '*Ca. Amarolinea*', (b)  
642 '*Ca. Villigracilis*', and (c) '*Ca. Sarcinithrix*', and EUBmix probe (Cy5-label, blue)  
643 targets most bacteria. Activated sludge was sampled from (a) Bjergmarken WWTP,  
644 (b) Odense North East WWTP, and (c) Aalborg West WWTP. Target filaments  
645 appear magenta, while all other cells appear blue. Scale bars represent 20  $\mu\text{m}$ .

646 **Figure 4.** FISH and corresponding bright-field MAR micrographs showing sugar  
647 uptake by three abundant Chloroflexi phylotypes ('*Ca. Amarolinea*' hybridized probe  
648 CFX64; '*Ca. Villigracilis*' sub-group A hybridized probe CFX763A; '*Ca.*  
649 '*Sarcinithrix*' hybridized probe CFX1151). Activated sludge was sampled in Aalborg  
650 West or Odense North West WWTPs. Target cells in FISH micrograph overlays  
651 appear yellow: specific probe (red) + EUBmix (green); and non-target cells appear  
652 green (EUBmix only). Black silver granules indicate positive MAR signal. Scale bar  
653 represents 10  $\mu\text{m}$ .



**Table 1.** Probes designed and optimized in this study.

| Probe                              | <i>E. coli</i> pos. | Target group                                | Coverage*      | Non-target hits | Sequence (5'-3')                    | [FA]%**   |
|------------------------------------|---------------------|---------------------------------------------|----------------|-----------------|-------------------------------------|-----------|
| <b>CFX64</b>                       | <b>64-99</b>        | <b>'Ca. Amarolinea spp.'</b>                | <b>1/2</b>     | <b>0</b>        | <b>TCT ACC TAA GCA GAC CGT TC</b>   | <b>30</b> |
| CFX64_H1 <sup>#</sup>              | 41-63               | Helper for CFX64                            | N/A            | N/A             | AAC TTG CAT GTG TTA AGC ACG CC      | N/A       |
| CFX64_H2 <sup>#</sup>              | 100-116             | Helper for CFX64                            | N/A            | N/A             | TCA CCC GTG CGC CAC TG              | N/A       |
| <b>CFX763A</b>                     | <b>763-783</b>      | <b>'Ca. Villigracilis spp.' sub-group A</b> | <b>68/260</b>  | <b>1</b>        | <b>GTT TAC TAC CCT AGC TTT CGC</b>  | <b>45</b> |
| CFX763A_C1                         | 763-783             | Competitor for CFX763A probe                | N/A            | N/A             | GTT CAC TAC CCT AGC TTT CGC         | N/A       |
| CFX763A_C2                         | 763-783             | Competitor for CFX763A probe                | N/A            | N/A             | GTT TAC TCC CCT AGC TTT CGC         | N/A       |
| CFX763A_C3                         | 763-783             | Competitor for CFX763A probe                | N/A            | N/A             | GTT TGC TAC CCT AGC TTT CGC         | N/A       |
| CFX763A_C4 <sup>Ψ</sup>            | 763-783             | Competitor for CFX763A probe                | N/A            | N/A             | GTT TAC TAC CCT AGC TGT CGC         | N/A       |
| CFX763AB_H1A                       | 784-808             | Helper for CFX763A, CFX763B                 | N/A            | N/A             | TAG GAT TAC CGG GGT CTC TAA TCC C   | N/A       |
| CFX763AB_H1B                       | 784-808             | Helper for CFX763A, CFX763B                 | N/A            | N/A             | TAG GAT TAC CSG GGG TCT CTA ATC CC  | N/A       |
| <b>CFX763B</b>                     | <b>763-783</b>      | <b>'Ca. Villigracilis spp.' sub-group B</b> | <b>91/260</b>  | <b>0</b>        | <b>GTT TAC TAC CCT AGC TGT CGC</b>  | <b>45</b> |
| CFX763B_C1 <sup>§</sup>            | 763-783             | Competitor for CFX763B probe                | N/A            | N/A             | GTT TAC TAC CCT AGC TTT CGC         | N/A       |
| <b>CFX763mix</b>                   | <b>763-783</b>      | <b>'Ca. Villigracilis spp.'</b>             | <b>159/260</b> | <b>1</b>        | <b>GTT TAC TAC CCT AGC TKT CGC</b>  | <b>45</b> |
| <b>CFX449</b>                      | <b>449-491</b>      | <b>'Ca. Sarcinithrix spp.'</b>              | <b>12/14</b>   | <b>1</b>        | <b>GGG ATA CCG TCC TTG TCT CT</b>   | <b>50</b> |
| CFX449_C1                          | 449-491             | Competitor for CFX449                       | N/A            | N/A             | GGG GTA CCG TCC TTG TCT CT          | N/A       |
| CFX449_H1                          | 492-516             | Helper for CFX449 probe                     | N/A            | N/A             | ACG TAG TTA GCC GAG ACT TAT TCC T   | N/A       |
| CFX449_H2                          | 422-448             | Helper for CFX449 probe                     | N/A            | N/A             | TCT CCC AGA AAA GRR GTT TAC GAC CCG | N/A       |
| <b>CFX1151</b>                     | <b>1151-1170</b>    | <b>'Ca. Sarcinithrix spp.'</b>              | <b>12/14</b>   | <b>1</b>        | <b>TTG ACT CCG GCA GTC CCA CT</b>   | <b>50</b> |
| CFX1151_C1                         | 1151-1170           | Competitor for CFX1151 probe                | N/A            | N/A             | TTG ACA CCG GCA GTC CCA CT          | N/A       |
| CFX1151_H1                         | 1171-1189           | Helper for CFX1151 probe                    | N/A            | N/A             | ATC CCC ACC TTC CTC CGG T           | N/A       |
| CFX1151_H2A                        | 1102-1127           | Helper for CFX1151 probe                    | N/A            | N/A             | TAA CTA GTA GBG AGG GTT GCG CTC GT  | N/A       |
| CFX1151_H2B                        | 1102-1127           | Helper for CFX1151 probe                    | N/A            | N/A             | TAA CTA GTA GCA GGG GTT GCG CTC GT  | N/A       |
| <b>CFX67<sup>⌘</sup></b>           | <b>67-89</b>        | <b>'Ca. Sarcinithrix spp.'</b>              | <b>6/14</b>    | <b>0</b>        | <b>TTC CGA AGA TYA GGT TCG</b>      | <b>35</b> |
| CFX67 <sub>comp</sub> <sup>⌘</sup> | 67-89               | Competitor for CFX67 probe                  | N/A            | N/A             | TTC CGA AGA TCG GGT TCG             | N/A       |
| CFX67-H46 <sup>⌘</sup>             | 46-66               | Helper for CFX67 probe                      | N/A            | N/A             | TTC GAC TTG CAT GTG TTA RGC         | N/A       |
| CFX67-H95 <sup>⌘</sup>             | 95-112              | Helper for CFX67 probe                      | N/A            | N/A             | CCG TRC GCC ACT AAC CYT             | N/A       |

\* Coverage of groups as defined in MiDAS database (Release 2.1)(McIlroy *et al.* 2015). Values given as group hits/ group totals; NA = Not applicable; \*\*Recommended optimal formamide concentration for use in FISH hybridizations. # These helper probes are not required for optimal fluorescent signal of their respective probe. Ψ Do not use this competitor if CFX763A is applied with CFX763B. § Do not use this competitor if CFX763B is applied with CFX763A. ⌘These probes are taken from Speirs *et al.* (2011).

**Table 2.** Abundance estimation: 16S rRNA amplicon sequencing and qFISH (percentage of total).

| WWTP                       | Sample date    | Abundance (%) |                                           |
|----------------------------|----------------|---------------|-------------------------------------------|
|                            |                | Sequencing*   | qFISH                                     |
| <b>‘Ca. Villigracilis’</b> |                |               |                                           |
| Odense North East          | September 2015 | 9.0           | sub-group A: 12 ± 4<br>sub-group B: 1 ± 1 |
| Aalborg East               | August 2015    | 6.0           | sub-group A: 11 ± 3<br>sub-group B: > 1   |
| Horsens                    | August 2006    | 6.0           | sub-group A: 11 ± 2<br>sub-group B: > 1   |
| Fredericia                 | October 2015   | 3.3           | sub-group A: 6 ± 1<br>sub-group B: > 1    |
| <b>‘Ca. Amarolinea’</b>    |                |               |                                           |
| Aalborg West               | May 2014       | 11.9          | 15.8                                      |
| Bjergmarken                | August 2013    | 33.7          | 30.2                                      |
| Odense North West          | August 2010    | 24.2          | 16.8                                      |
| <b>‘Ca. Sarcinithrix’</b>  |                |               |                                           |
| Viby                       | August 2008    | 2.3           | 2                                         |
| Boeslum                    | August 2008    | 2.1           | 3                                         |
| Bjergmarken                | February 2013  | 1.2           | 2                                         |
| Ejby Mølle                 | May 2008       | 1.0           | 1                                         |
| Aalborg West               | February 2012  | 0.8           | 1                                         |

\* Taken from the 16S rRNA gene amplicon sequencing MiDAS survey of Danish WWTPs (McIlroy *et al.* 2015).

**Table 3.** Summary of the known *in situ* physiology for Chloroflexi commonly found in activated sludge.

| Property                              | ' <i>Ca. Amarolinea</i> '      | ' <i>Ca. Villigracilis</i> '   | ' <i>Ca. Sarcinithrix</i> '    | ' <i>Ca. Promineofilum</i> ' | ' <i>Ca. Defluviifilum</i> '     | ' <i>Kouleothrix</i> '         | Chloroflexi Summary                  |
|---------------------------------------|--------------------------------|--------------------------------|--------------------------------|------------------------------|----------------------------------|--------------------------------|--------------------------------------|
| <i>Substrate uptake</i>               |                                |                                |                                |                              |                                  |                                |                                      |
| Formate                               | ND                             | ND                             | ND                             | ND                           | - <sub>6</sub>                   | - <sub>2</sub>                 | - <sub>2,6</sub>                     |
| Acetate                               | - <sub>1</sub>                 | - <sub>1</sub>                 | - <sub>1</sub>                 | - <sub>9</sub>               | - <sub>6,8</sub>                 | - <sub>2</sub>                 | + <sub>2</sub> / <sub>-2,6,8,9</sub> |
| Propionate                            | - <sub>1</sub>                 | - <sub>1</sub>                 | - <sub>1</sub>                 | - <sub>9</sub>               | - <sub>6,8</sub>                 | - <sub>2</sub>                 | - <sub>2,6,8,9</sub>                 |
| Butyrate                              | - <sub>1</sub>                 | - <sub>1</sub>                 | - <sub>1</sub>                 | - <sub>9</sub>               | - <sub>6</sub>                   | + <sub>2</sub> / <sub>-2</sub> | + <sub>2</sub> / <sub>-2,6,9</sub>   |
| Lactate                               | - <sub>1</sub>                 | - <sub>1</sub>                 | - <sub>1</sub>                 | ND                           | ND                               | ND                             |                                      |
| Pyruvate                              | - <sub>1</sub>                 | - <sub>1</sub>                 | - <sub>1</sub>                 | - <sub>9</sub>               | - <sub>6,8</sub>                 | + <sub>2</sub> / <sub>-2</sub> | + <sub>2</sub> / <sub>-2,6,8,9</sub> |
| Oleic acid                            | ND                             | ND                             | ND                             | - <sub>9</sub>               | + <sub>8</sub> / <sub>-6,8</sub> | - <sub>2</sub>                 | + <sub>5</sub> / <sub>-2,6,8,9</sub> |
| Glucose                               | + <sub>1</sub>                 | - <sub>1</sub>                 | + <sub>1</sub> / <sub>-1</sub> | + <sub>9</sub>               | + <sub>6,8</sub>                 | + <sub>2</sub>                 | + <sub>2,3,6,8,9</sub>               |
| Mannose                               | - <sub>1</sub>                 | - <sub>1</sub>                 | - <sub>1</sub>                 | ND                           | + <sub>8</sub> / <sub>-6</sub>   | + <sub>2</sub> / <sub>-2</sub> | + <sub>2,7</sub> / <sub>-2,6</sub>   |
| Galactose                             | + <sub>1</sub> / <sub>-1</sub> | - <sub>1</sub>                 | + <sub>1</sub> / <sub>-1</sub> | ND                           | + <sub>8</sub> / <sub>-6</sub>   | - <sub>2</sub>                 | + <sub>2,7</sub> / <sub>-2,6</sub>   |
| Fructose                              | + <sub>1</sub> / <sub>-1</sub> | + <sub>1</sub> / <sub>-1</sub> | + <sub>1</sub>                 | ND                           | ND                               | ND                             | ND                                   |
| NAG                                   | - <sub>1</sub>                 | - <sub>1</sub>                 | - <sub>1</sub>                 | - <sub>9</sub>               | + <sub>6</sub> / <sub>-6</sub>   | + <sub>2</sub>                 | + <sub>2,3,6</sub> / <sub>-2,9</sub> |
| Glycine                               | ND                             | ND                             | ND                             | ND                           | - <sub>6,8</sub>                 | - <sub>2</sub>                 | - <sub>2,6,8</sub>                   |
| Leucine                               | ND                             | ND                             | ND                             | ND                           | - <sub>6,8</sub>                 | + <sub>2</sub> / <sub>-2</sub> | + <sub>2</sub> / <sub>-2,6,8</sub>   |
| Amino acid mix                        | - <sub>1</sub>                 | - <sub>1</sub>                 | - <sub>1</sub>                 | - <sub>9</sub>               | ND                               | ND                             | - <sub>9</sub>                       |
| Thymidine                             | ND                             | ND                             | ND                             | ND                           | - <sub>6</sub>                   | ND                             | + <sub>2</sub> / <sub>-6</sub>       |
| Ethanol                               | - <sub>1</sub>                 | - <sub>1</sub>                 | - <sub>1</sub>                 | - <sub>9</sub>               | - <sub>6,8</sub>                 | - <sub>2</sub>                 | - <sub>2,6,8,9</sub>                 |
| Glycerol                              | - <sub>1</sub>                 | - <sub>1</sub>                 | - <sub>1</sub>                 | - <sub>9</sub>               | - <sub>8</sub>                   | ND                             | - <sub>8,9</sub>                     |
| <i>Chemoautotrophy</i>                | - <sub>1</sub> *               | - <sub>1</sub> *               | - <sub>1</sub> *               | ND                           | - <sub>6</sub>                   | - <sub>2</sub> **              | - <sub>2,6</sub>                     |
| <i>Electron acceptor conditions</i>   |                                |                                |                                |                              |                                  |                                |                                      |
| Aerobic                               | + <sub>1</sub>                 | + <sub>1</sub> / <sub>-1</sub> | + <sub>1</sub>                 | + <sub>9</sub>               | + <sub>6,8</sub>                 | + <sub>2</sub>                 | + <sub>2,6,8,9</sub>                 |
| Anoxic                                | + <sub>1</sub>                 | + <sub>1</sub> / <sub>-1</sub> | + <sub>1</sub>                 | + <sub>9</sub>               | + <sub>6</sub>                   | - <sub>2</sub>                 | + <sub>6,9</sub> / <sub>-2,6</sub>   |
| Anoxic + NO <sub>2</sub> <sup>-</sup> | + <sub>1</sub>                 | + <sub>1</sub> / <sub>-1</sub> | ND                             | ND                           | + <sub>6</sub>                   | - <sub>2</sub>                 | + <sub>6</sub> / <sub>-2,4,6</sub>   |
| Anoxic + NO <sub>3</sub> <sup>-</sup> | + <sub>1</sub>                 | + <sub>1</sub> / <sub>-1</sub> | ND                             | ND                           | + <sub>6</sub>                   | - <sub>2</sub>                 | + <sub>6</sub> / <sub>-2,6</sub>     |
| <i>Storage polymers (staining)</i>    |                                |                                |                                |                              |                                  |                                |                                      |
| PHA                                   | - <sub>1</sub>                 | ND <sup>1</sup>                | - <sub>7</sub>                 | - <sub>5</sub>               | - <sub>6</sub>                   | ND                             | - <sub>5,6</sub>                     |
| Polyphosphate                         | - <sub>1</sub>                 | ND <sup>1</sup>                | - <sub>7</sub>                 | - <sub>5</sub>               | + <sub>6</sub> / <sub>-6</sub>   | ND                             | + <sub>6</sub> / <sub>-5,6</sub>     |
| <i>Hydrophobic surface (MAC)</i>      |                                |                                |                                |                              |                                  |                                |                                      |
|                                       | - <sub>1</sub>                 | ND <sup>1</sup>                | - <sub>1</sub>                 | - <sub>9</sub>               | + <sub>6</sub>                   | - <sub>2</sub>                 | + <sub>6</sub> / <sub>-2,9</sub>     |

**References:** **1.** This study; **2.** (Kragelund *et al.* 2007); **3.** (Miura, Watanabe and Okabe 2007); **4.** (Morgan-Sagastume, Nielsen and Nielsen 2008); **5.** (Speirs *et al.* 2009); **6.** (Kragelund *et al.* 2011); **7.** (Speirs *et al.* 2011); **8.** (Kindaichi *et al.* 2013); **9.** (McIlroy *et al.* 2016). \* carbonate with and without ammonia; \*\* anaerobic with 2 mM thiosulfate present.

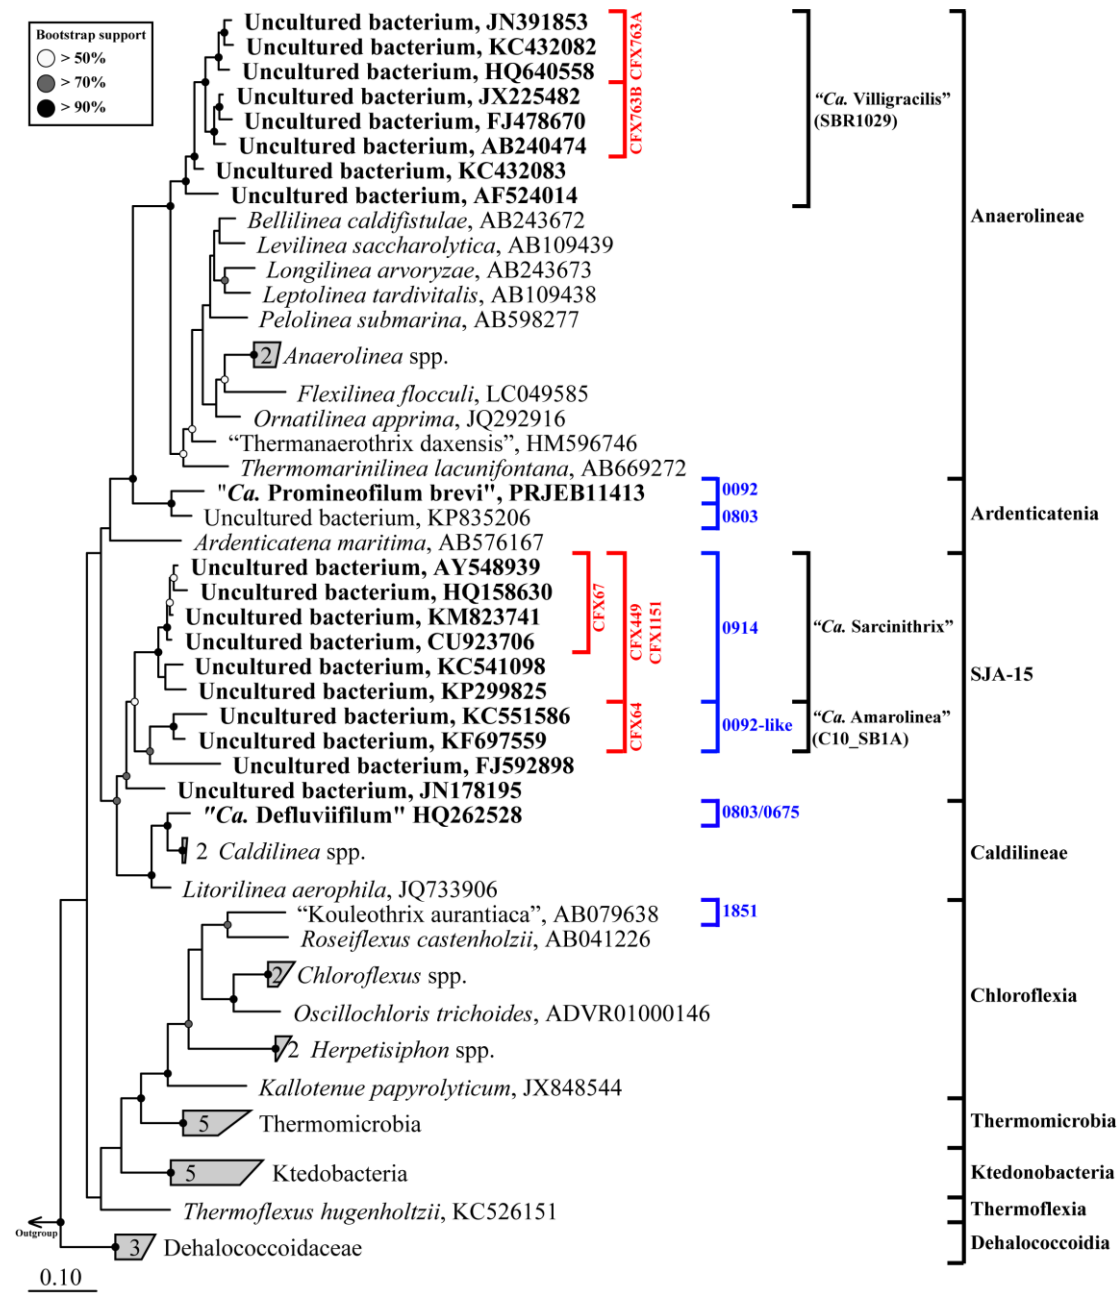

**Figure 1.** Maximum-likelihood (PhyML) 16S rRNA gene phylogenetic tree of abundant activated sludge phylotypes (bold typeface) and isolated members of the phylum Chloroflexi. The alignment used for the tree applied a 20% conservational filter to remove hypervariable positions, giving 1108 aligned positions. Phylogenetic classification is indicated with black brackets and is based on the MiDAS database (Release 2.1). Probe coverage of probes relevant to the current study is shown with red coloured brackets. Associated activated sludge morphotypes of previously described phylotypes are designated with blue coloured brackets. Bootstrap values from 100 resamplings are indicated for branches with >50% (white dot), 50-70% (gray), and >90% (black) support. Species of the phylum Cyanobacteria were used as the outgroup. The scale bar represents substitutions per nucleotide base.

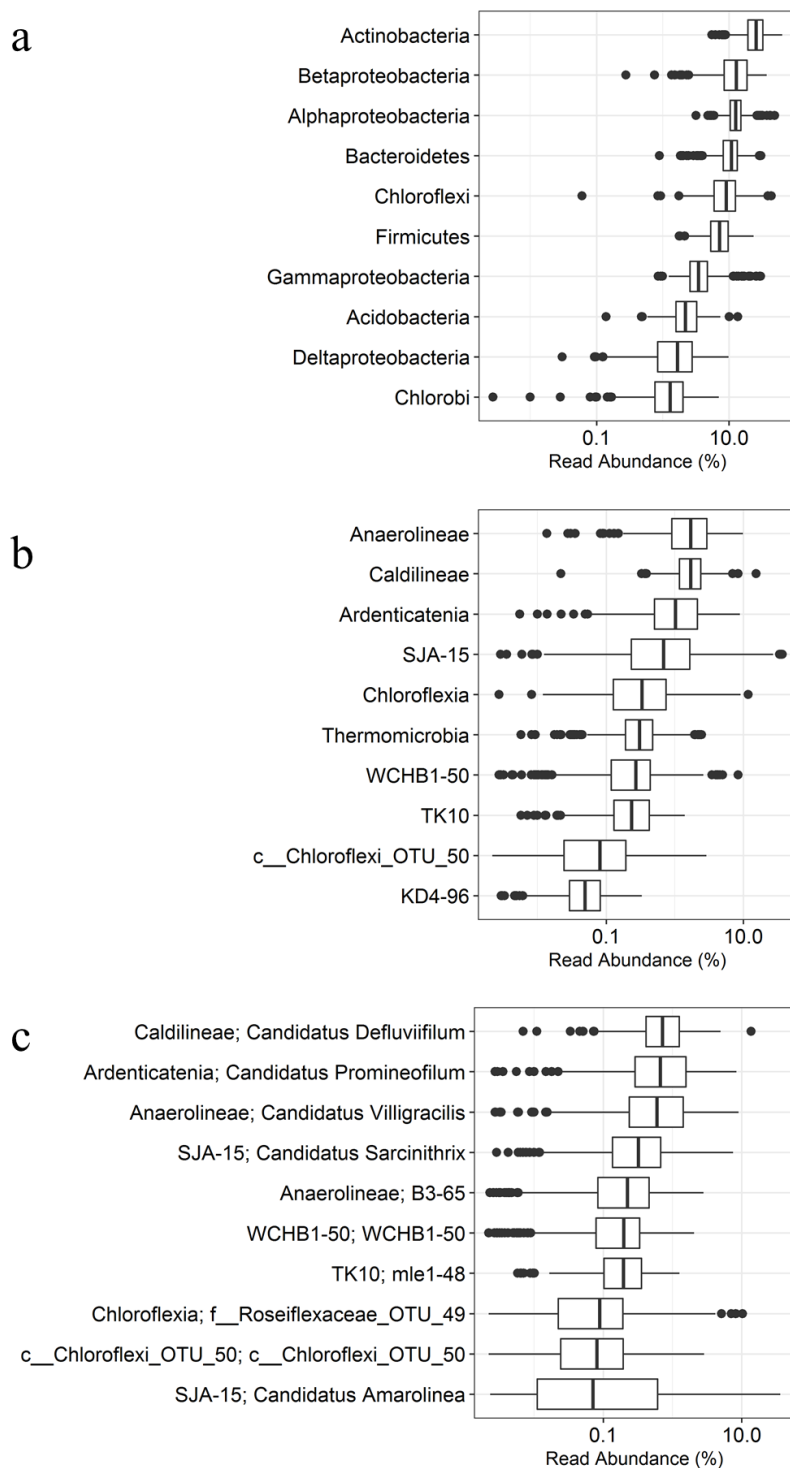

**Figure 2.** Distribution of Chloroflexi in 25 full-scale activated sludge WWTPs sampled 2-4 times per year from 2006 to 2015. (a) 10 most abundant phyla in Danish WWTPs. (b) 10 most abundant Chloroflexi classes in Danish WWTPs (c) 10 most abundant Chloroflexi genera in Danish WWTPs. X-axis shows the relative read abundance in percentage of total bacteria.



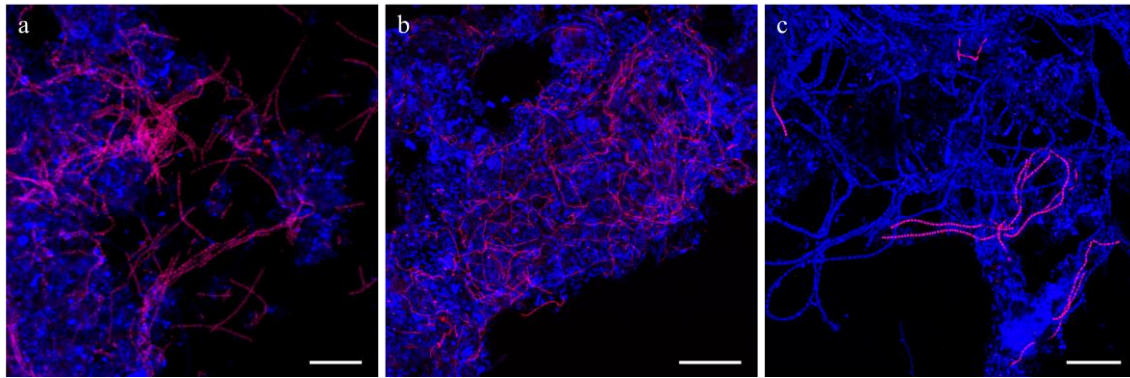

**Figure 3.** Composite FISH micrographs of novel Chloroflexi genera in full-scale activated sludge. Specific probes (Cy3-label, red) target (a) ‘*Ca. Amarolinea*’, (b) ‘*Ca. Villigracilis*’, and (c) ‘*Ca. Sarcinithrix*’, and EUBmix probe (Cy5-label, blue) targets most bacteria. Activated sludge was sampled from (a) Bjergmarken WWTP, (b) Odense North East WWTP, and (c) Aalborg West WWTP. Target filaments appear magenta, while all other cells appear blue. Scale bars represent 20  $\mu\text{m}$ .

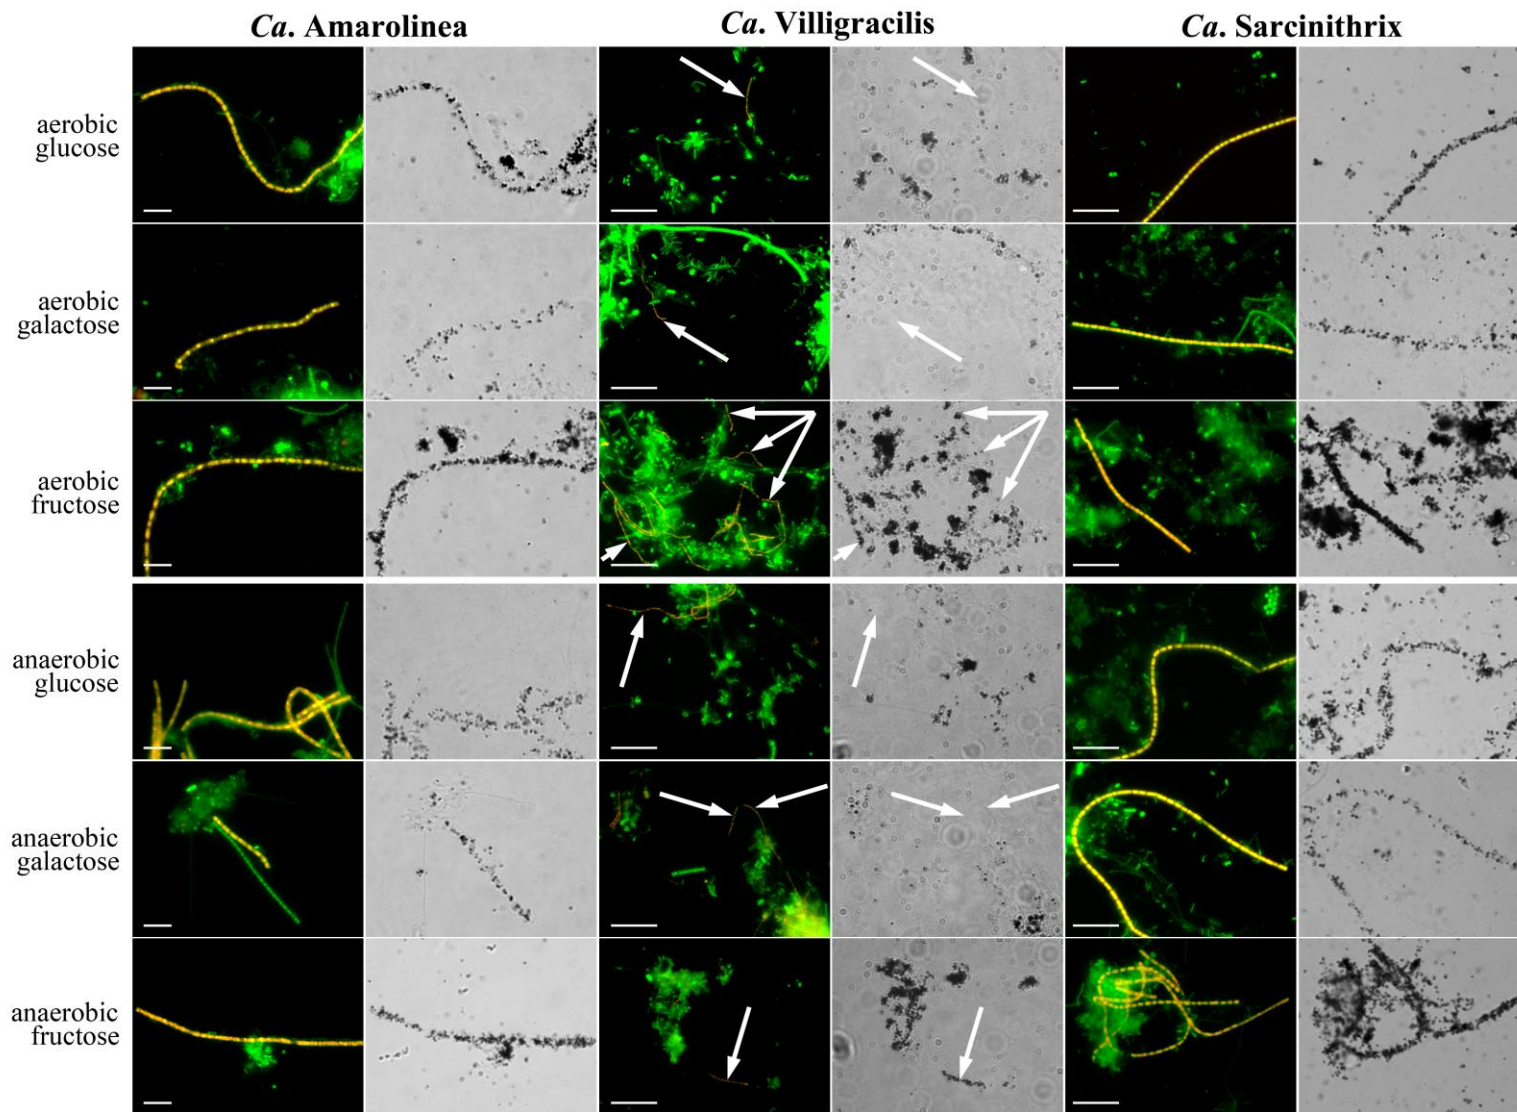

**Figure 4.** FISH and corresponding bright-field MAR micrographs showing sugar uptake by three abundant Chloroflexi phylotypes (*‘Ca. Amarolinea’* hybridized probe CFX64; *‘Ca. Villigracilis’* sub-group A hybridized probe CFX763A; *‘Ca. Sarcinithrix’* hybridized probe CFX1151). Activated sludge was sampled in Aalborg West or Odense North West WWTPs. Target cells in FISH micrograph overlays appear yellow: specific probe (red) + EUBmix (green); and non-target cells appear green (EUBmix only). Black silver granules indicate positive MAR signal. Scale bar represents 10  $\mu\text{m}$ .
